# Supplementary material for: Stem Cell-Induced Inflammation in Cholesteatoma Is Inhibited by the TLR4 Antagonist LPS-RS
Source: MDPI journal article supplement (doi:10.3390/cells9010199), 2020-01-14
Supplement: s1 [file s1]

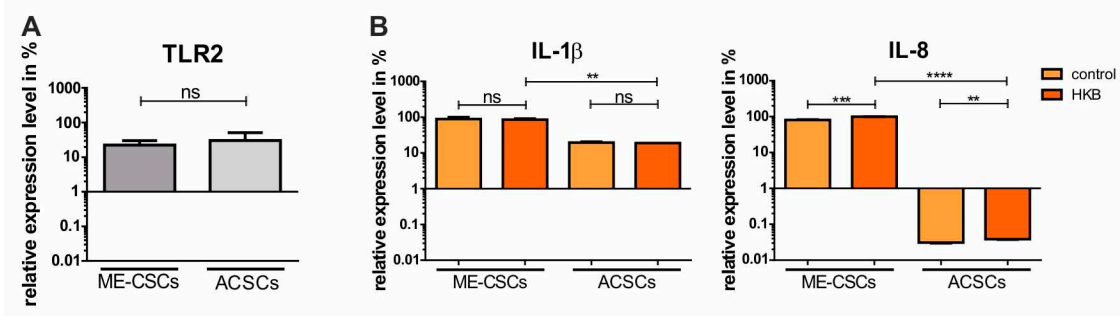

**Figure S1.** Inflammatory signaling in ME-CSCs is not mediated via TLR2. (A) qPCR analysis revealed no significant changes in the expression of TLR2 between ME-CSCs and ACSCs (mean of the relative expression levels from ME-CSCs and ACSCs,  $n=3$ ,  $ns>0.05$ , Mann Whitney test, one-tailed, confidence interval: 95%) (B) Expression levels of IL-1 $\beta$  and IL-8 in ME-CSCs and ACSCs were not affected by exposure to heat killed *S. aureus* (HBK) (mean of the relative expression levels from ME-CSCs and ACSCs,  $n=3$ ,  $****\leq 0.0001$ ,  $***\leq 0.001$ ,  $**\leq 0.01$ ,  $ns>0.05$ , unpaired t-test, one-tailed, confidence interval: 95%).

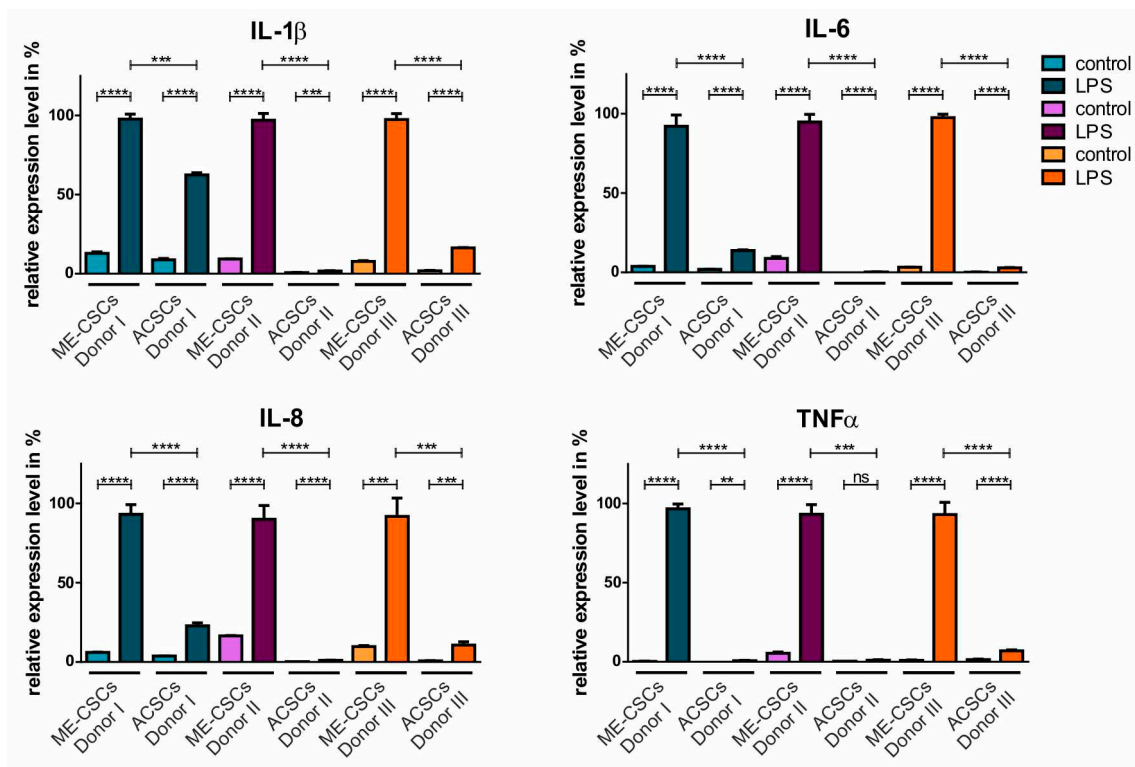

**Figure S2.** Expression levels of pro-inflammatory genes in ME-CSCs and ACSCs upon LPS-stimulation on single-donor level. Pro-inflammatory mediators IL-1 $\beta$ , IL-6, IL-8 and TNF $\alpha$  were strongly and significantly increased in all ME-CSCs populations derived from three donors after treatment with LPS from *S. enterica* compared to untreated control and LPS-treated ACSCs ( $****\leq 0.0001$ ,  $***\leq 0.001$ ,  $ns>0.05$ , unpaired t-test, one-tailed, confidence interval: 95%).

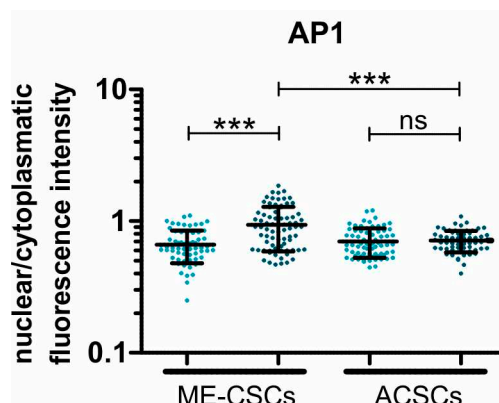

**Figure S3.** Significant translocation of AP1 protein in ME-CSCs upon LPS-treatment. Quantification of nuclear/cytoplasmic fluorescence intensity of immunocytochemical stainings revealed significantly increased nuclear protein amounts of AP-1 in LPS-treated ME-CSCs compared to control and ACSCs exposed to LPS (LPS from *S. enterica*, \*\*\* $\leq 0.001$ , ns $> 0.05$ , Mann Whitney test, one-tailed, confidence interval: 95%).

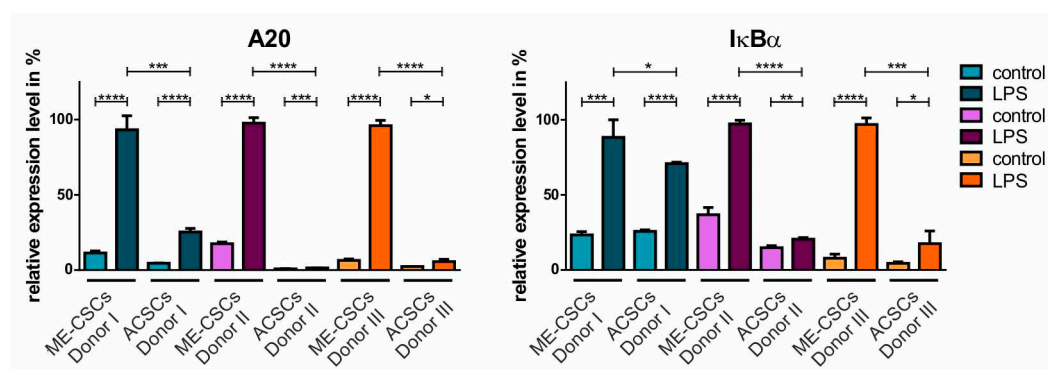

**Figure S4.** Expression levels of NF- $\kappa$ B target genes A20 and I $\kappa$ B $\alpha$  in ME-CSCs and ACSCs upon LPS-stimulation on single-donor level. NF- $\kappa$ B target genes A20 and I $\kappa$ B $\alpha$  were strongly and significantly increased in all ME-CSCs populations derived from three donors after treatment with LPS from compared to untreated control and LPS-treated ACSCs (\*\*\*\* $\leq 0.0001$ , \*\*\* $\leq 0.001$ , \*\* $\leq 0.01$ , \* $\leq 0.05$ , unpaired t-test, one-tailed, confidence interval: 95%).

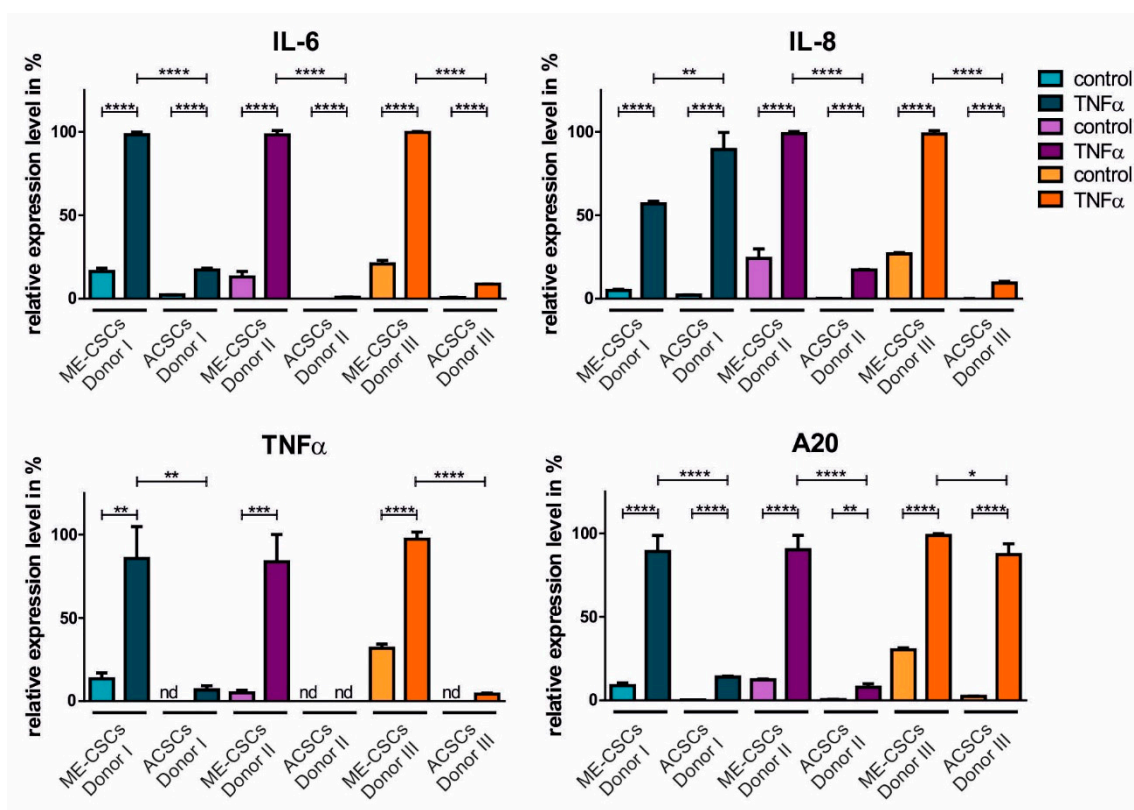

**Figure S5.** ME-CSCs show a TNF $\alpha$ -mediated feed-forward-loop of pro-inflammatory NF- $\kappa$ B target gene expression on single-donor level. qPCR analysis revealed a significant increase in the expression levels of IL-6, IL-8, TNF $\alpha$  and A20 in ME-CSCs stimulated with TNF $\alpha$  compared to control and TNF $\alpha$ -stimulated ACSCs (\*\*\*\* $\leq 0.0001$ , \*\*\* $\leq 0.001$ , \*\* $\leq 0.01$ , \* $\leq 0.05$ , unpaired t-test, one-tailed, confidence interval: 95%, nd: not detectable).
